# Supplementary material for: Ecotoxicological and Interactive Effects of Copper and Chromium on Physiochemical, Ultrastructural, and Molecular Profiling inBrassica napusL.
Source: Hindawi journal article supplement (doi:10.1155/2018/9248123), 2018-01-01
Supplement: f1 [file 9248123.f1.pdf]

## Supplementary Material

TABLE S1: Primers used for qRT-PCR.

| Primer name | From 5' to 3'         |
|-------------|-----------------------|
| SOD F       | ACGGTGTGACCACTGTGACT  |
| SOD R       | GCACCGTGTTGTTTACCATC  |
| POD F       | ATGTTTCGTGCGTCTCTGTC  |
| POD R       | TACGAGGGTCCGATCTTAGC  |
| CAT F       | TCGCCATGCTGAGAAGTATC  |
| CAT R       | TCTCCAGGCTCCTTGAAGTT  |
| APX F       | ATGAGGTTTGACGGTGAGC   |
| APX R       | CAGCATGGGAGATGGTAGG   |
| GR F        | AAGCTGGAGCTGTGAAGGTT  |
| GR R        | AGACAGTGTTTCGCAAAGCAG |
| Actin F     | TTGGGATGGACCAGAAGG    |
| Actin R     | TCAGGAGCAATACGGAGC    |

TABLE S2: Effects of copper (Cu) and chromium (Cr) on shoot height (mm), root length (mm), and leaf, stem, and root biomass (g) in two *Brassica napus* cultivars under different metal treatments.

| Cultivar | Treatment           | Leaf FW     | Stem FW      | Root FW      | Leaf DW        | Stem DW         | Root DW        | Shoot height | Root length |
|----------|---------------------|-------------|--------------|--------------|----------------|-----------------|----------------|--------------|-------------|
| ZS 758   | CK                  | 2.31±0.095a | 0.56±0.050a  | 0.44±0.045a  | 0.1436±0.0045a | 0.0284±0.0005a  | 0.0356±0.0007a | 32.50±1.87a  | 33.77±1.06a |
|          | Cu 200µM            | 2.07±0.075b | 0.44±0.040b  | 0.34±0.050b  | 0.1111±0.0070c | 0.0240±0.0006b  | 0.0333±0.0016a | 24.43±1.40b  | 29.60±0.89b |
|          | Cr 200µM            | 1.78±0.121c | 0.35±0.035c  | 0.25±0.040c  | 0.0909±0.0071d | 0.0218±0.0015bc | 0.0262±0.0025b | 20.80±0.82c  | 25.27±0.91c |
|          | Cu 200µM + Cr 200µM | 1.47±0.090d | 0.25±0.025d  | 0.20±0.055c  | 0.0732±0.0028e | 0.0186±0.0010c  | 0.0170±0.0018d | 17.13±0.42d  | 22.40±0.80d |
| ZD 622   | CK                  | 2.28±0.105a | 0.57±0.035a  | 0.43±0.055a  | 0.1281±0.0079b | 0.0301±0.0057a  | 0.0341±0.0039a | 30.97±1.10a  | 34.20±1.40a |
|          | Cu 200µM            | 1.83±0.110c | 0.39±0.060bc | 0.27±0.060bc | 0.0940±0.0019d | 0.0238±0.0005b  | 0.0270±0.0010b | 21.27±1.01c  | 26.40±1.10c |
|          | Cr 200µM            | 1.42±0.090d | 0.25±0.040d  | 0.22±0.030c  | 0.0705±0.0022e | 0.0211±0.0011bc | 0.0221±0.0009c | 17.17±0.70d  | 19.87±0.85e |
|          | Cu 200µM +Cr 200µM  | 1.15±0.060e | 0.15±0.035e  | 0.12±0.015d  | 0.0487±0.0026f | 0.0139±0.0010d  | 0.0110±0.0007e | 10.53±0.51e  | 13.43±0.65f |

Data are the means of three replicates (mean  $\pm$  SD). Values followed by the different letters indicate significant differences followed by Duncan's multiple range test ( $p < 0.05$ ) for each cultivar at different metal application treatments.
